# Supplementary material for: Legitimate and Reliable Determination of the Age-Related Intestinal Microbiome in Young Piglets; Rectal Swabs and Fecal Samples Provide Comparable Insights
Source: PubMed Central journal article supplement (PMC6702655; doi:10.3389/fmicb.2019.01886), 2019-08-14

Supplementary material for:

**Legitimate and reliable determination of the age-related intestinal microbiome in young piglets; rectal swabs and fecal samples provide comparable insights**

**R. Choudhury<sup>1</sup>, A. Middelkoop<sup>2</sup>, J.E. Bolhuis<sup>2</sup>, M. Kleerebezem<sup>1\*</sup>**

<sup>1</sup>Host-Microbe Interactomics Group, Department of Animal Sciences, Wageningen University & Research, Wageningen, The Netherlands

<sup>2</sup>Adaptation Physiology Group, Department of Animal Sciences, Wageningen University & Research, Wageningen, The Netherlands

**Table S1:** Table with sample information, read and OTU counts. Number of reads after quality control and removal of chimeric sequences. Number of OTUs at an identity threshold of 97% . Pre=Pre-Swab; Fresh=Fececs, Post= Post-Swab .

| Animal               | Age     | Sample     | Total Number of reads | Reads in OTU | Number of OTUs |
|----------------------|---------|------------|-----------------------|--------------|----------------|
| Pig 1                | 7 days  | 1_a_Pre    | 64856                 | 46461        | 400            |
| Pig 1                | 7 days  | 1_b_Fresh  | 51335                 | 35088        | 370            |
| Pig 1                | 7 days  | 1_c_Post   | 61620                 | 47897        | 330            |
| Pig 2                | 7 days  | 2_a_Pre    | 61549                 | 47488        | 505            |
| Pig 2                | 7 days  | 2_b_Fresh  | 68932                 | 42785        | 538            |
| Pig 2                | 7 days  | 2_c_Post   | 50107                 | 36861        | 358            |
| Pig 3                | 7 days  | 3_a_Pre    | 60780                 | 39727        | 435            |
| Pig 3                | 7 days  | 3_b_Fresh  | 49371                 | 32034        | 393            |
| Pig 3                | 7 days  | 3_c_Post   | 57895                 | 43054        | 463            |
| Pig 6                | 7 days  | 6_a_Pre    | 53275                 | 42209        | 302            |
| Pig 6                | 7 days  | 6_b_Fresh  | 63850                 | 40993        | 358            |
| Pig 6                | 7 days  | 6_c_Post   | 58549                 | 44955        | 386            |
| Pig 8                | 7 days  | 8_a_Pre    | 61275                 | 40263        | 377            |
| Pig 8                | 7 days  | 8_b_Fresh  | 56143                 | 34577        | 379            |
| Pig 8                | 7 days  | 8_c_Post   | 61297                 | 47089        | 660            |
| Pig 10               | 7 days  | 10_a_Pre   | 63996                 | 41900        | 350            |
| Pig 10               | 7 days  | 10_b_Fresh | 64251                 | 38930        | 411            |
| Pig 10               | 7 days  | 10_c_Post  | 58679                 | 43788        | 338            |
| Pig 11 (Pig1_Age20)  | 20 days | 11_a_Pre   | 64456                 | 48163        | 471            |
| Pig 11 (Pig1_Age20)  | 20 days | 11_b_Fresh | 52314                 | 32978        | 525            |
| Pig 11 (Pig1_Age20)  | 20 days | 11_c_Post  | 63502                 | 49349        | 520            |
| Pig 12 (Pig2_Age20)  | 20 days | 12_a_Pre   | 54479                 | 31076        | 847            |
| Pig 12 (Pig2_Age20)  | 20 days | 12_b_Fresh | 59355                 | 35360        | 572            |
| Pig 12 (Pig2_Age20)  | 20 days | 12_c_Post  | 53176                 | 33136        | 579            |
| Pig 13 (Pig3_Age20)  | 20 days | 13_a_Pre   | 67458                 | 45113        | 395            |
| Pig 13 (Pig3_Age20)  | 20 days | 13_b_Fresh | 53850                 | 32569        | 658            |
| Pig 13 (Pig3_Age20)  | 20 days | 13_c_Post  | 59725                 | 43014        | 641            |
| Pig 14               | 20 days | 14_a_Pre   | 48248                 | 30951        | 593            |
| Pig 14               | 20 days | 14_b_Fresh | 61313                 | 40682        | 672            |
| Pig 14               | 20 days | 14_c_Post  | 53789                 | 36363        | 628            |
| Pig 15               | 20 days | 15_a_Pre   | 59364                 | 41193        | 805            |
| Pig 15               | 20 days | 15_b_Fresh | 55591                 | 33321        | 615            |
| Pig 15               | 20 days | 15_c_Post  | 60832                 | 47610        | 705            |
| Pig 16 (Pig6_Age20)  | 20 days | 16_a_Pre   | 63236                 | 39146        | 651            |
| Pig 16 (Pig6_Age20)  | 20 days | 16_b_Fresh | 67263                 | 37811        | 594            |
| Pig 16 (Pig6_Age20)  | 20 days | 16_c_Post  | 57183                 | 44139        | 659            |
| Pig 17               | 20 days | 17_a_Pre   | 65898                 | 52736        | 420            |
| Pig 17               | 20 days | 17_b_Fresh | 57385                 | 37528        | 603            |
| Pig 17               | 20 days | 17_c_Post  | 62514                 | 48299        | 422            |
| Pig 19               | 20 days | 19_a_Pre   | 60277                 | 43478        | 373            |
| Pig 19               | 20 days | 19_b_Fresh | 75951                 | 50056        | 380            |
| Pig 19               | 20 days | 19_c_Post  | 55105                 | 38751        | 360            |
| Pig 20 (Pig10_Age20) | 20 days | 20_a_Pre   | 69700                 | 46683        | 785            |
| Pig 20 (Pig10_Age20) | 20 days | 20_b_Fresh | 61750                 | 38903        | 716            |
| Pig 20 (Pig10_Age20) | 20 days | 20_c_Post  | 56498                 | 41380        | 695            |

**Fig. S1:** Taxonomic composition of the 16S rRNA samples. Stacked bar plot depicting relative microbial abundances of all samples at phyla level. Pig 1- 10 are 7 days old (time-point 1) and Pig 11 - 20 are 20 days old (time-point 2); Pre=Pre-Swab; Fresh=Feces, Post= Post-Swab. The figure highlights individual variation captured irrespective of the sample type.

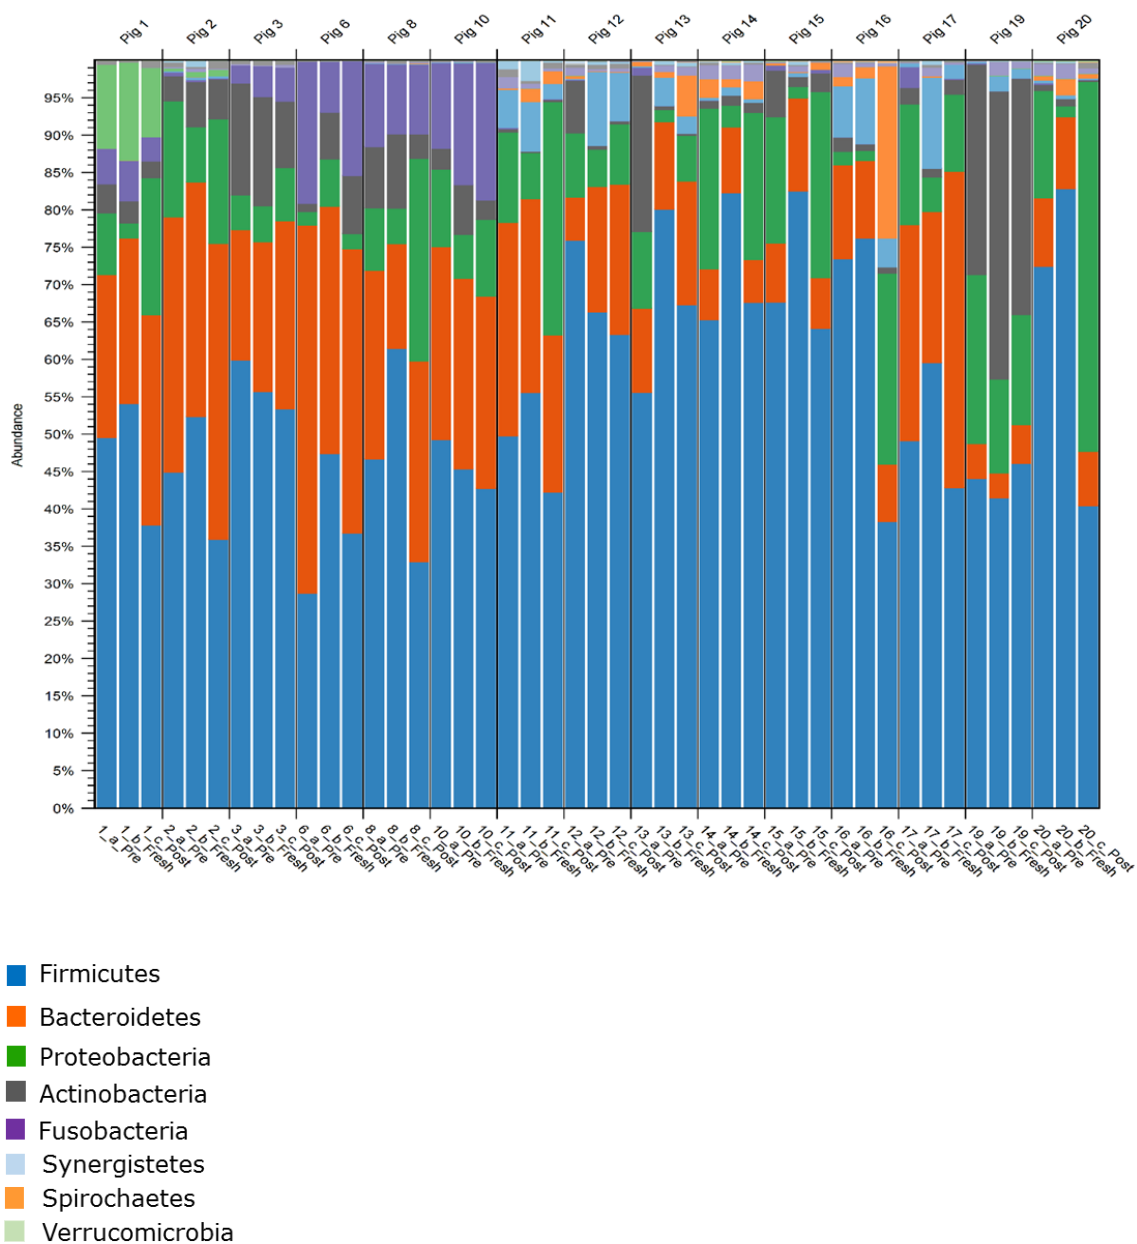

**Fig. S2:** Biplot of redundancy analysis (RDA) of environmental variables in fecal samples (day20 only) at genus level. **A.** Gender **B.** Pen. Constrained explanatory variables are indicated by triangles. Top right shows the p-value of Monte Carlo Permutation testing. F = fecal Sample, Number = animal ID.

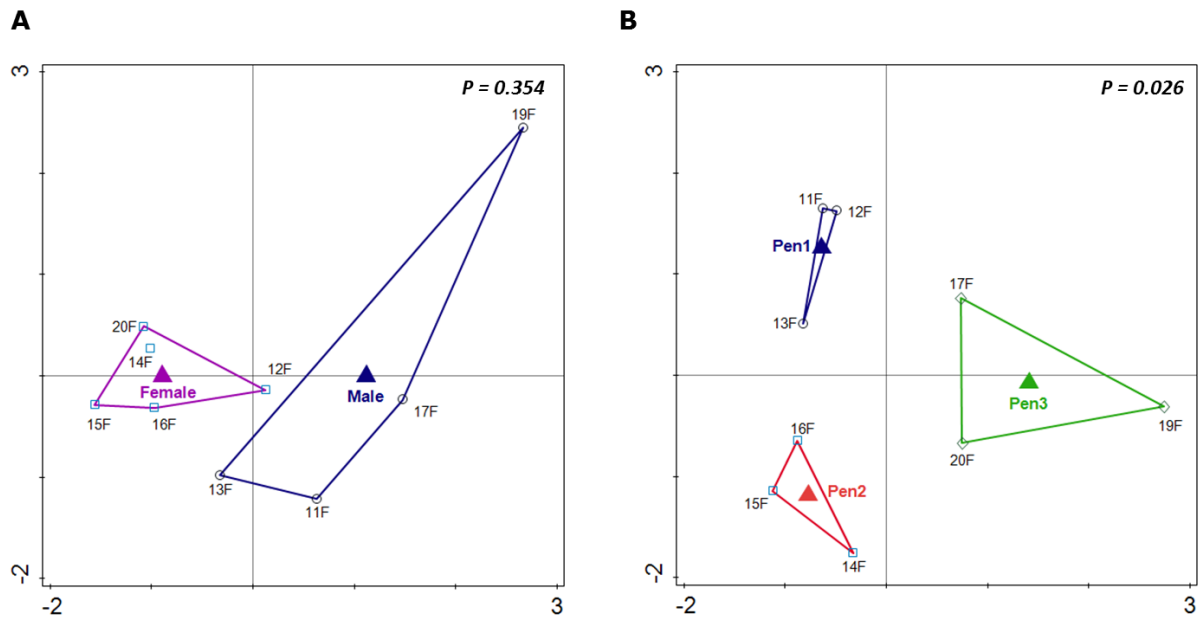

**Fig. S3:** Venn diagram of bacterial communities with shared and unique operational taxonomic units with at least 10 reads (total OTUs found 1334) in feces, pre-swab or post-swab samples. The percentage within the diagram represents the percentage of the total OTUs unique and shared among the sample types. The percentages (in red) shown outside the diagram represent the relative abundance captured by the 686 shared OTUs.

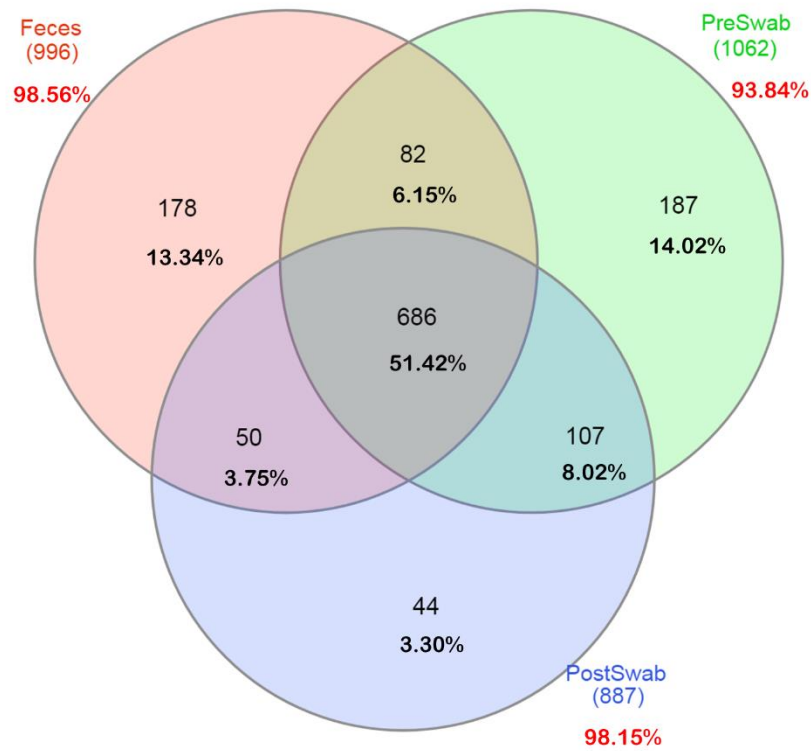

**Fig. S4:** Alpha and Beta diversity of sample types **A.** Number of species and **B.** Chao1 bias corrected. **C.** PERMANOVA analysis of Weighted UniFrac of sample types at two time-points.

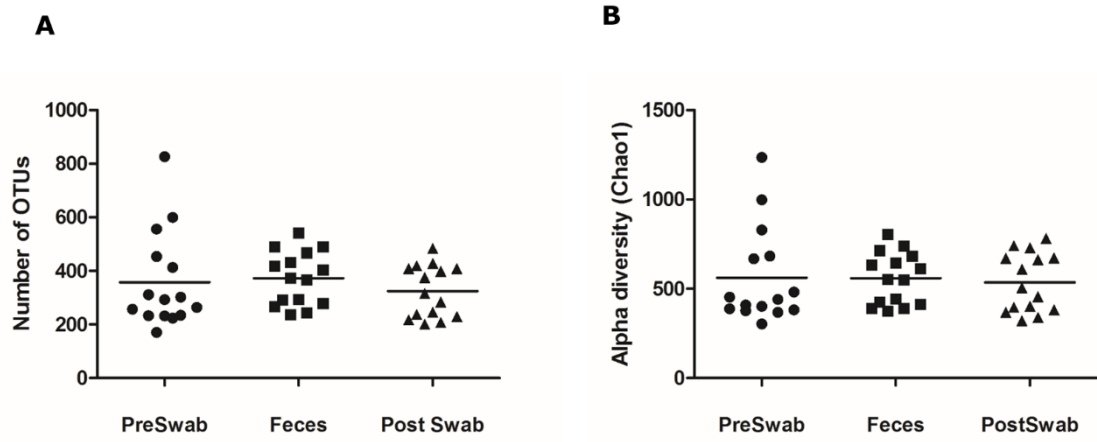

**C**

| PERMANOVA of Weighted UniFrac | Age d7 | Age d20 |
|-------------------------------|--------|---------|
| Pre-Swab vs Faeces            | P=1.00 | P=0.317 |
| Faeces vs Post-Swab           | P=1.00 | P=1.00  |
| Pre-Swab vs Post-Swab         | P=1.00 | P=0.32  |

**Fig. S5:** Differential abundance of microbial families in three animals (not significant).

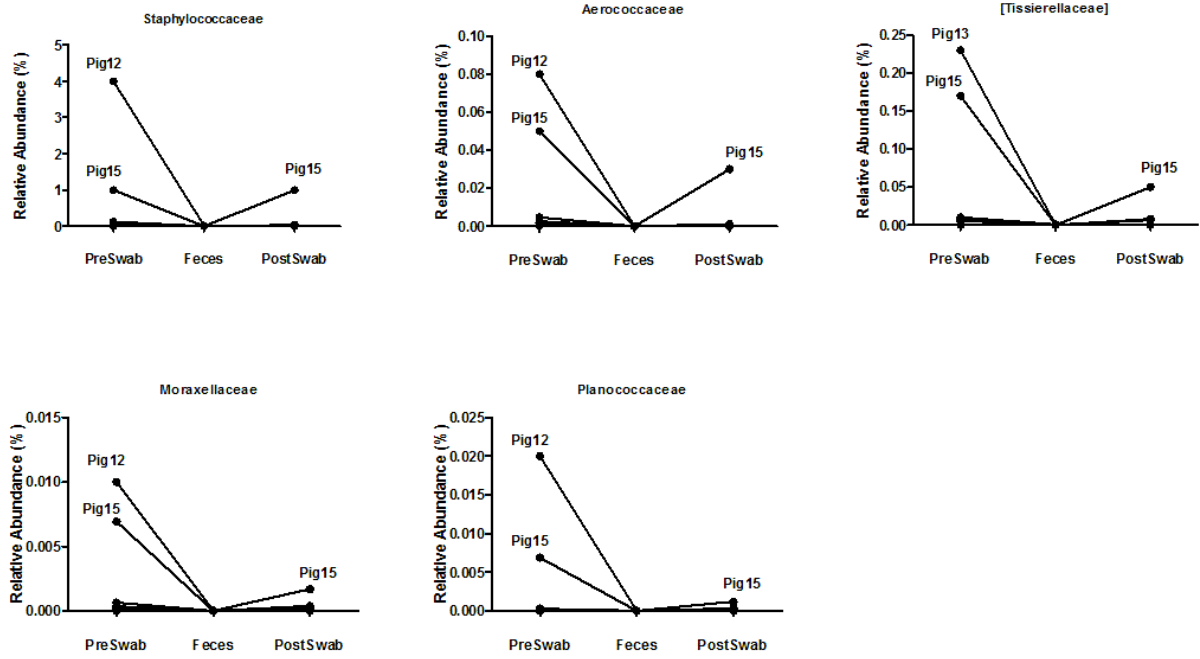

**Fig. S6:** Partial redundancy analysis (pRDA) for the explanatory variable age (corrected for pen) at genus level.  
 A. Feces (RD1 = 38.85% and RD2 = 10.83%). B. Rectal swabs (RD1 = 16.64% and RD2 = 15.59%)

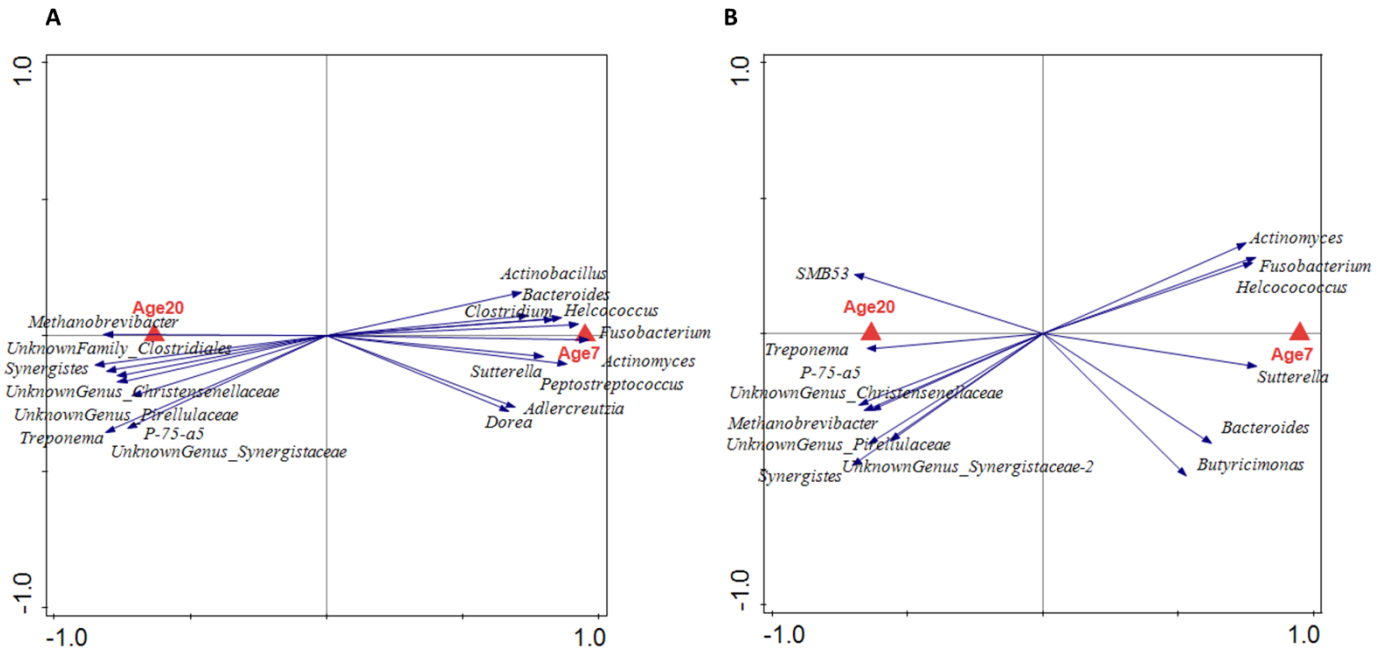



**Fig. S7:** Relative abundance of sample types (phylum level) at both time-points (the age is indicated in “days after birth”).

\*:  $p < 0.05$ , \*\*:  $p < 0.01$ .

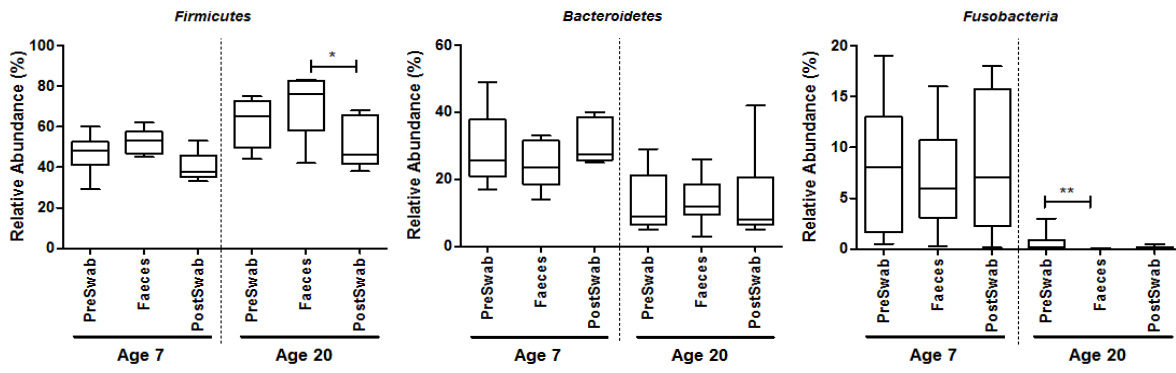

**Fig. S8:** Principal component analysis of explanatory variables and Redundancy analysis (partial RDA) of age variable (corrected for pen) for **A, C.** Pre-swab samples and **B, D.** Post-swab Samples.

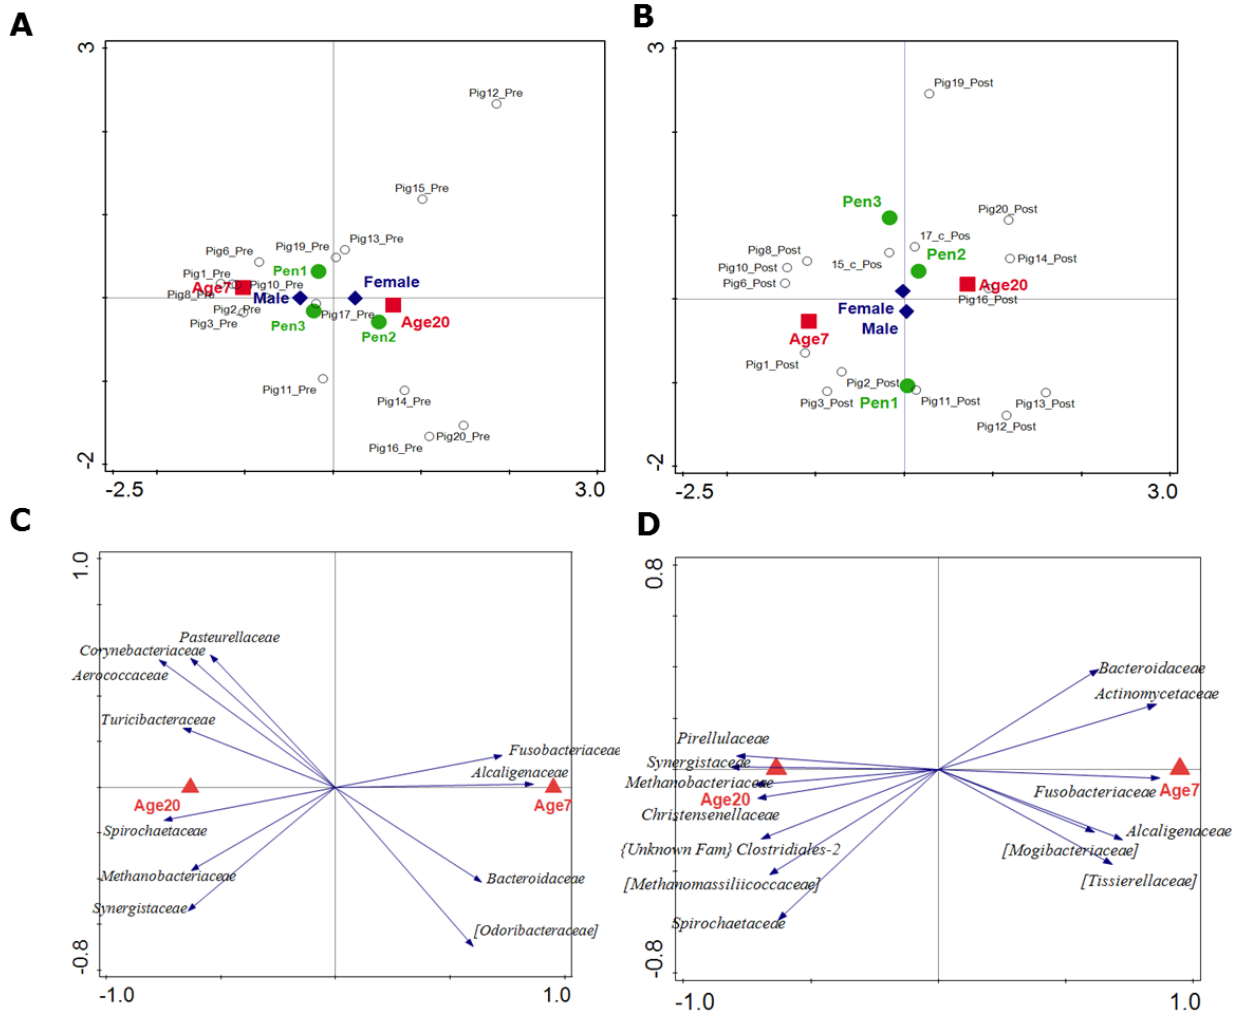

**Fig. S9:** Heat map showing relative abundance of most discriminative bacterial families for age variable (corrected for pen) for **A. Pre-swab** and **B. Post-swab** samples.

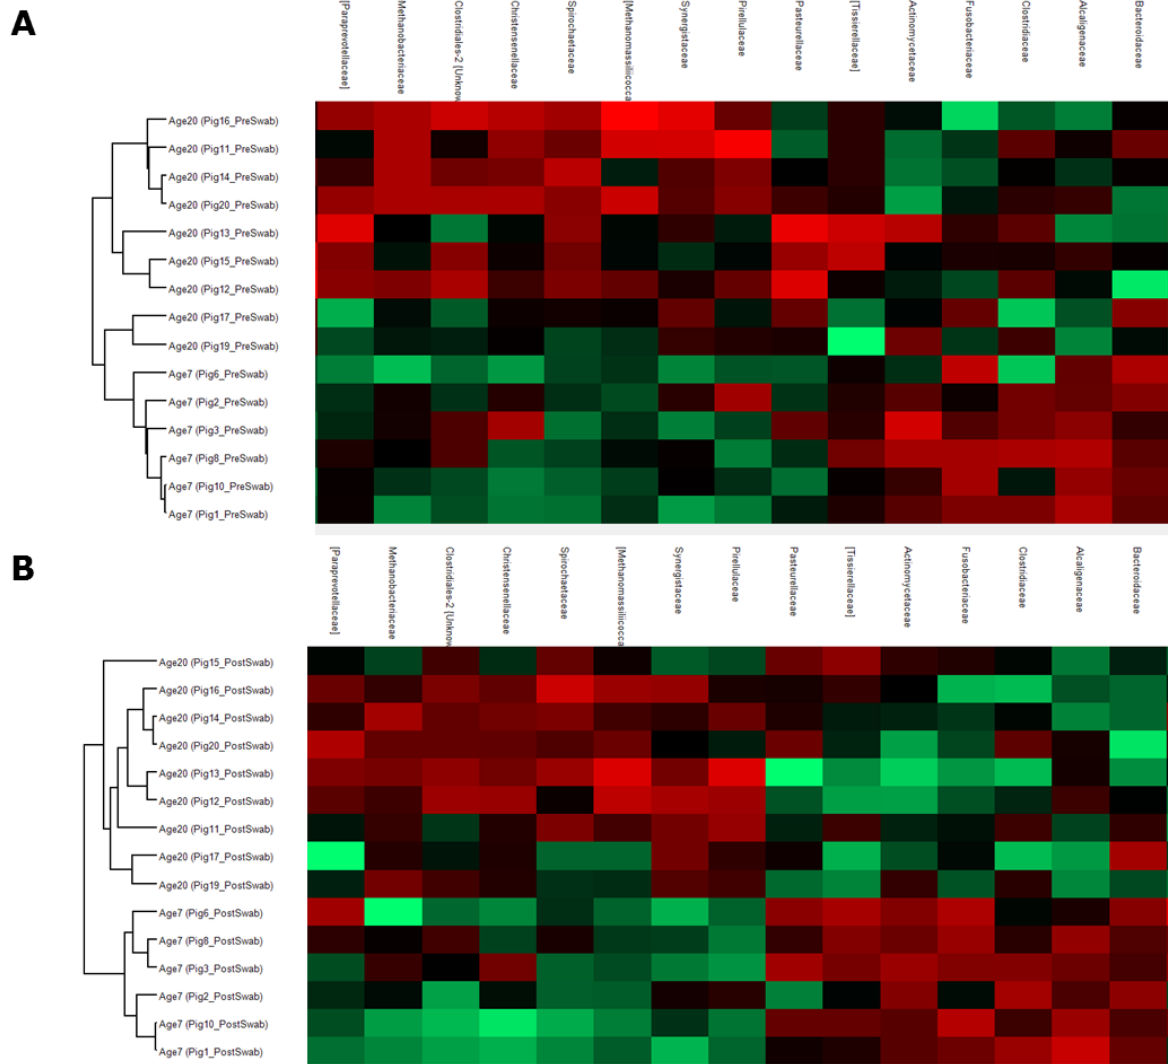

Supplement: Presentation_1.pdf [file Presentation_1.pdf]
